# Supplementary material for: Mucin Expression Profiles in Ulcerative Colitis: New Insights on the Histological Mucosal Healing
Source: MDPI journal article supplement (doi:10.3390/ijms25031858), 2024-02-03
Supplement: s1 [file s1]

# **Mucin expression profiles in Ulcerative Colitis: new insights on the histological mucosal healing**

Leoncini Giuseppe, MD<sup>1</sup>, Cari Luigi PhD<sup>2</sup>, Ronchetti Simona PhD<sup>2</sup>, Donato Francesco MD<sup>3</sup>, Caruso Laura<sup>4</sup>, Calafà Cristina<sup>4</sup>, Villanacci Vincenzo MD<sup>5</sup>

<sup>1</sup> First Pathology Division, Department of Pathology and Laboratory Medicine, Fondazione IRCCS Istituto Nazionale dei Tumori, Milan, Italy.

<sup>2</sup> Pharmacology Division, Department of Medicine and Surgery, University of Perugia, Perugia, Italy

<sup>3</sup> Unit of Hygiene, Epidemiology and Public Health, University of Brescia, Brescia, Italy

<sup>4</sup> Pathology Unit, Department of Pathology and Laboratory Medicine, Desenzano del Garda Hospital, ASST del Garda, Brescia, Italy

<sup>5</sup> Institute of Pathology, ASST Spedali Civili, Brescia, Italy

## **Supplementary Materials**

A

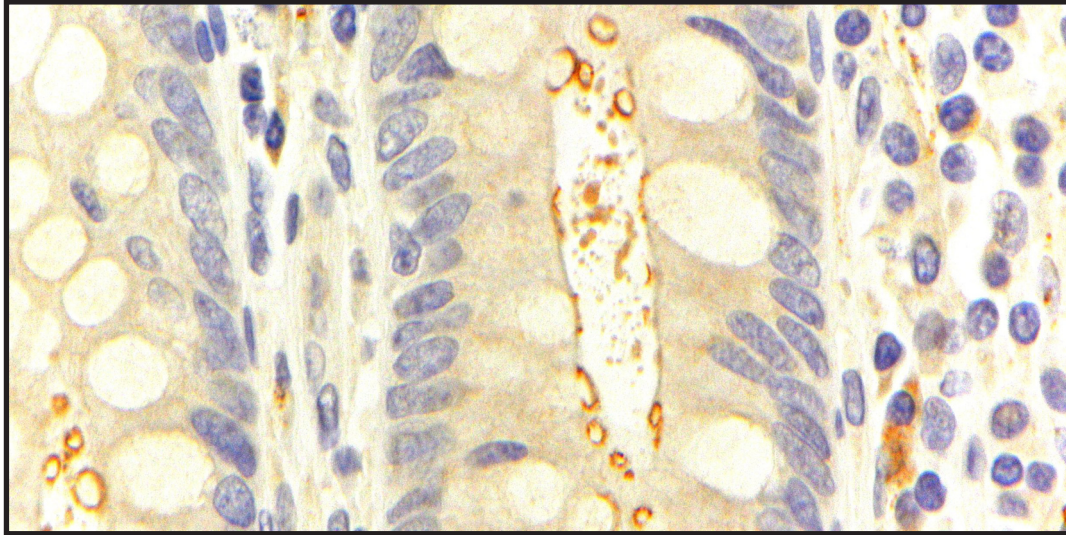

B

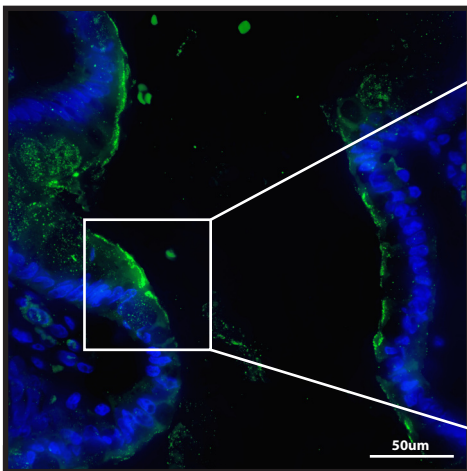

C

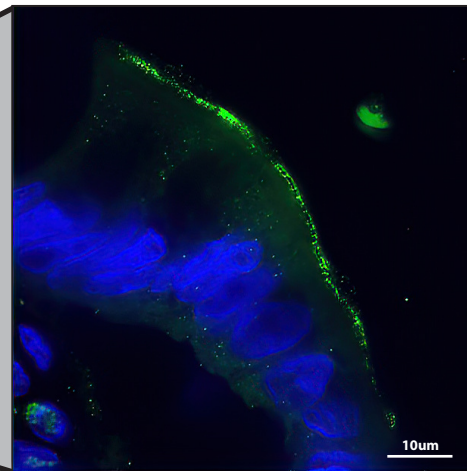

D

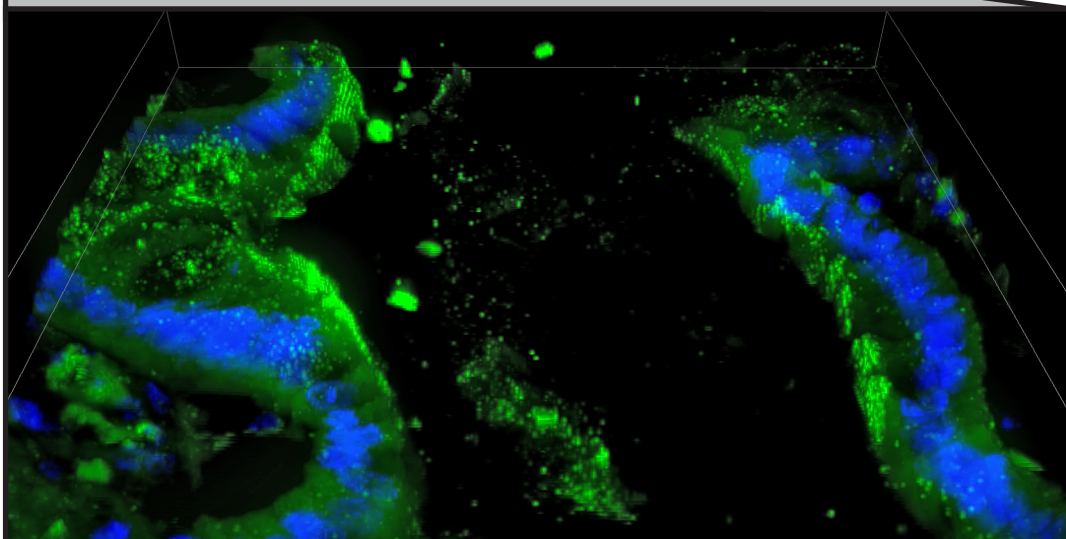

### Figure S1. IHC and IF Staining of MUC15

The *membranous* (m) expression pattern of MUC15 appears faint in immunohistochemical analysis (A) but is clearly visible in confocal immunofluorescence analysis. Sixty-six focal planes (Z-range 19.5µm, Z-step 0.30µm) were acquired, and the maximum intensity projection (MIP) is presented in panel B. Details of the membranous MUC15 expression pattern are depicted in panel C through a deconvoluted cropped image. Panel D showcases a confocal 3D reconstruction of the same field. IHC magnification: x20; IF magnification: x60

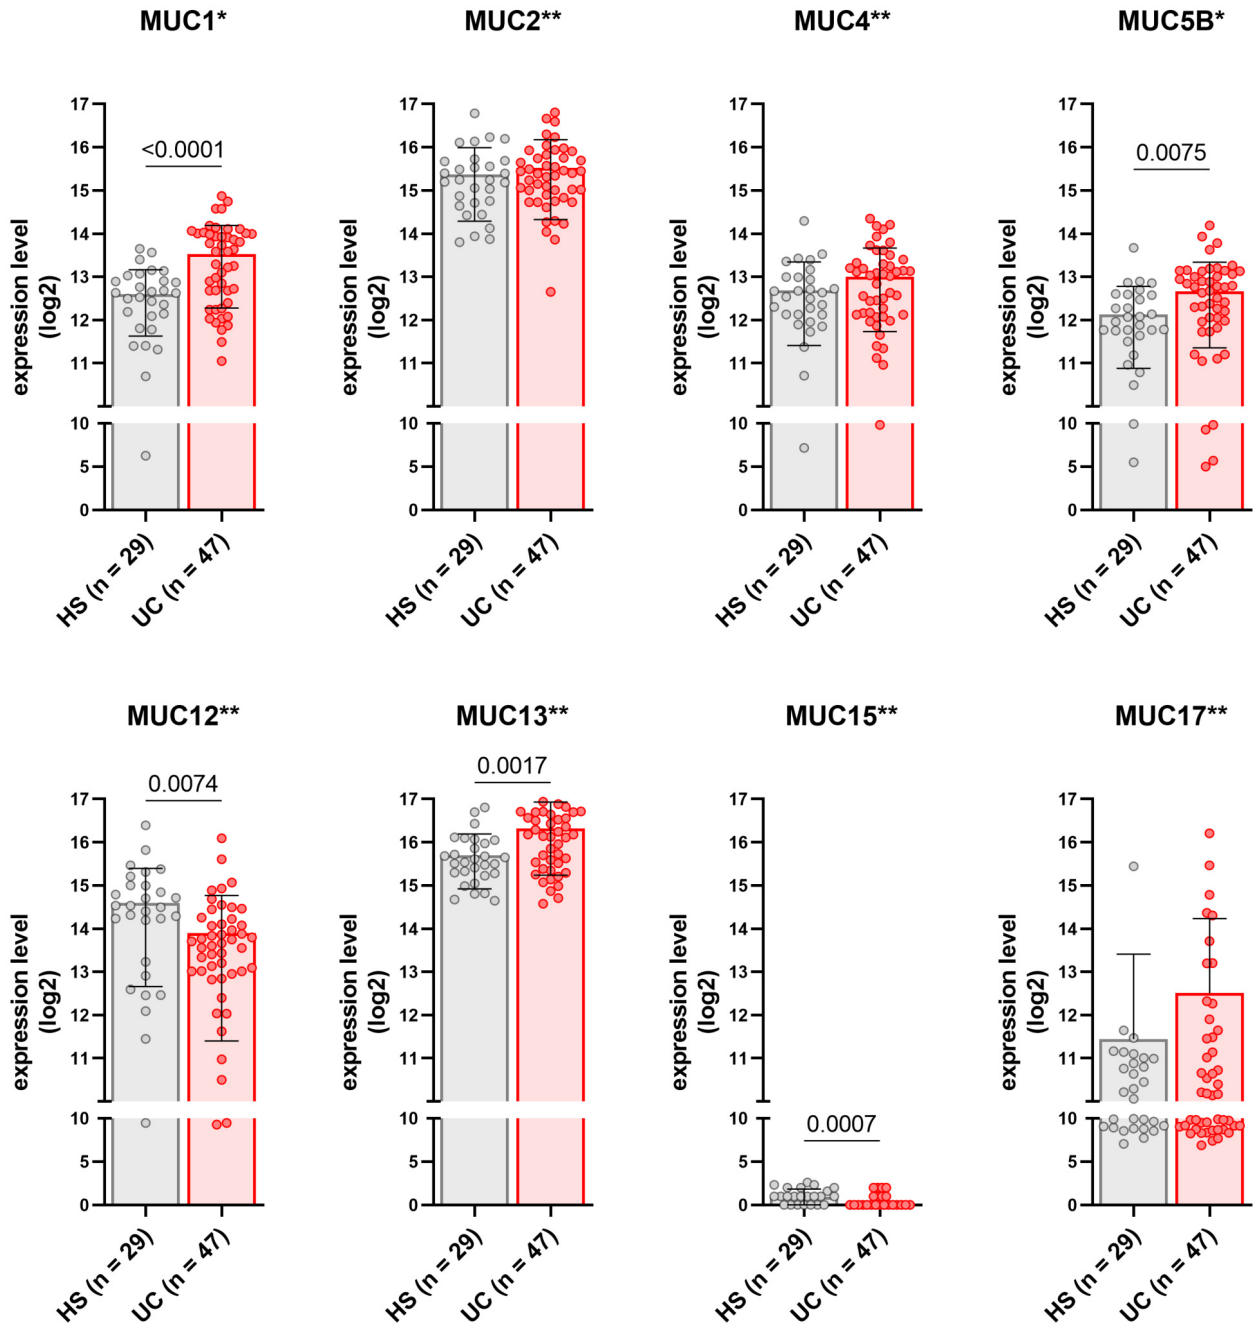

**Figure S2. Transcriptional mucin expression profile**

Transcriptomics data were retrieved from the *Inflammatory Bowel Disease Multi'omics Database* (IBDMDB). Mucin expression levels were compared between healthy donors (gray, n = 27) and UC patients (red, n = 47). The data are presented using a histogram, where each dot represents an individual patient; expression values  $\pm$  SD are displayed on a log2 scale. P-values < 0.05 were considered statistically significant; \*unpaired t-test (Welch); \*\* Mann-Whitney test.

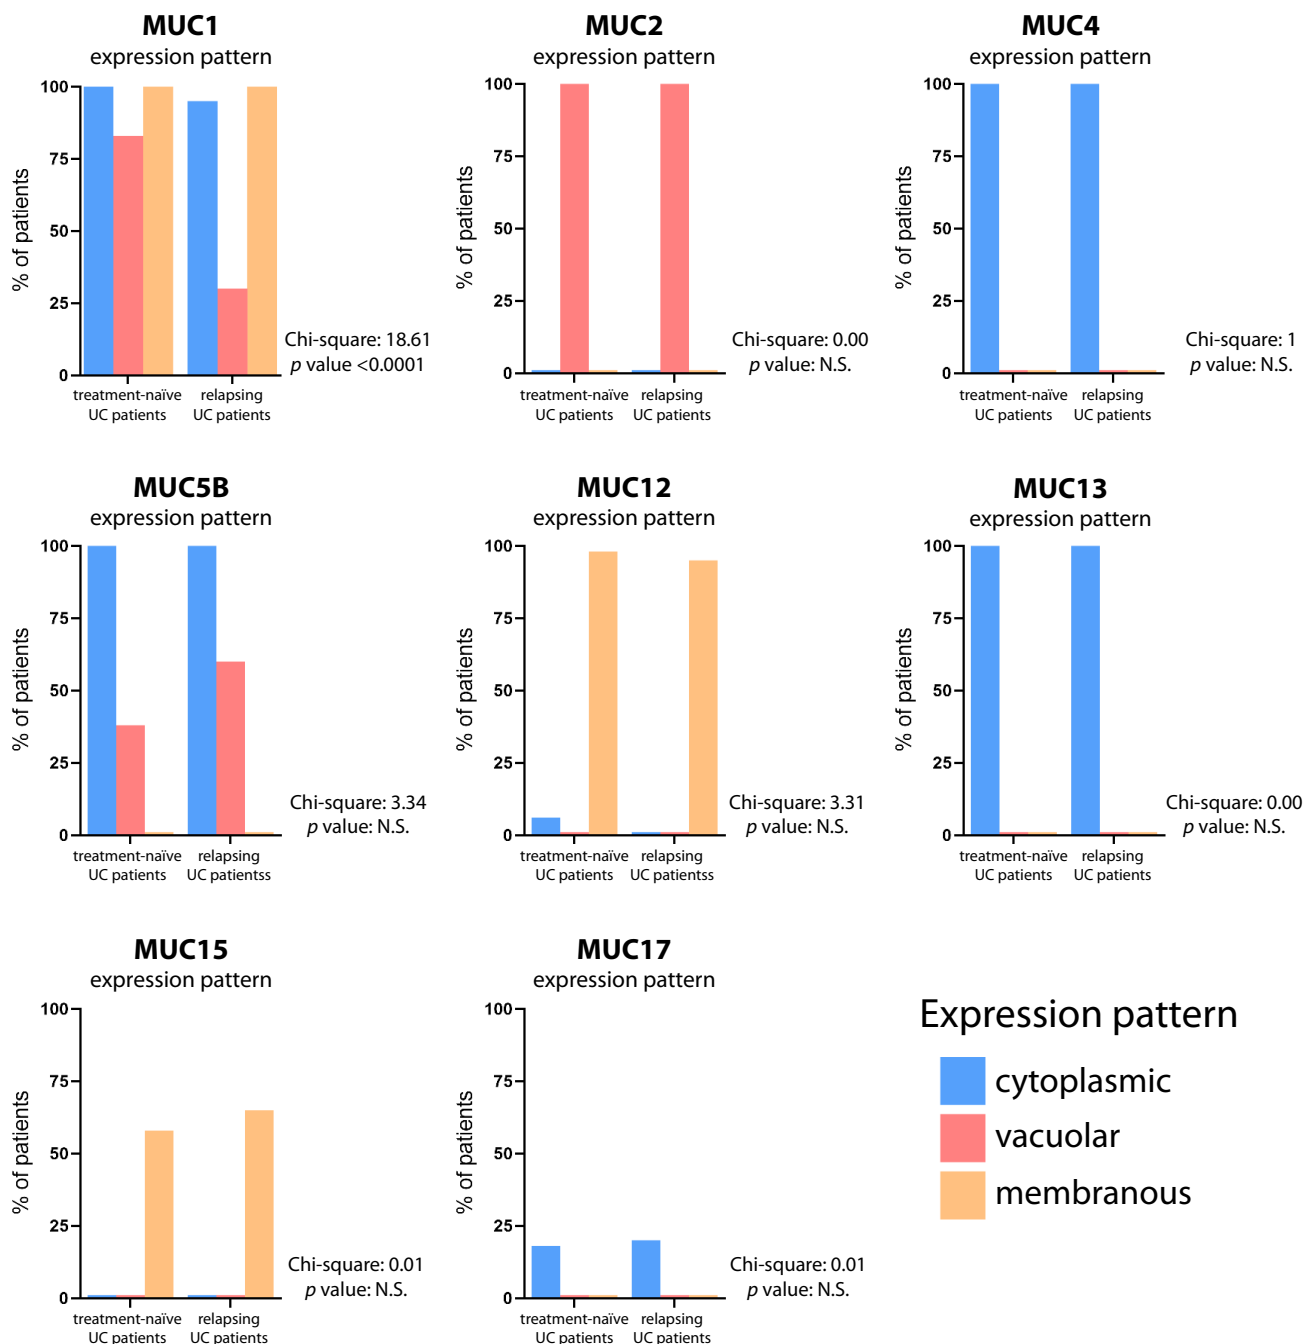

**Figure S3. Mucin expression pattern comparison between treatment-naïve and relapsing UC patients**

The graphs depict the mucin expression patterns in both the treatment-naïve and relapsing UC patients. The percentage of patients displaying cytoplasmic (blue bar), vacuolar (red bar), and membranous (yellow bar) expression patterns is reported. The contingency test (Chi-square test) was utilized to assess the statistical significance of agreement in mucin expression patterns, with a significance level set at  $p < 0.05$ .



A

Factors predicted within a dissimilarity margin less or equal than 5 % :

|                          |                    |                    |                               |
|--------------------------|--------------------|--------------------|-------------------------------|
| GR-beta [T01920]         | RXR-alpha [T01345] | C/EBPbeta [T00581] | YY1 [T00915]                  |
| XBP-1 [T00902]           | c-Myb [T00137]     | STAT4 [T01577]     | c-Ets-1 [T00112]              |
| SRY [T00997]             | TCF-4E [T02878]    | GR [T05076]        | NF-Y [T00150]                 |
| Sp1 [T00759]             | T3R-beta1 [T00851] | GCF [T00320]       | PPAR-alpha:RXR-alpha [T05221] |
| TFIID [T00820]           | NF-AT1 [T01948]    | c-Myc [T00140]     | USF1 [T00874]                 |
| STAT1beta [T01573]       | IRF-1 [T00423]     | GATA-2 [T00308]    | MAZ [T00490]                  |
| PXR-1:RXR-alpha [T05671] | VDR [T00885]       | NF-1 [T00539]      | C/EBPalpha [T00105]           |
| Pax-5 [T00070]           | GR-alpha [T00337]  | TFII-1 [T00824]    | AP-2alpha [T00035]            |
| c-Ets-2 [T00113]         | IRF-2 [T01491]     | p53 [T00671]       | GATA-1 [T00306]               |
| ENKTF-1 [T00255]         | FOXp3 [T04280]     | PR B [T00696]      | PR A [T01661]                 |
| CREB [T00163]            | ATF3 [T01313]      | ATF-2 [T00167]     | NFI/CTF [T00094]              |
| Elk-1 [T00250]           | LEF-1 [T02905]     | RAR-beta [T00721]  | RAR-alpha [T00261]            |
| USF2 [T00878]            | TBP [T00794]       | EBF [T05427]       | RAR-beta:RXR-alpha [T05420]   |
| HIF-1 [T01609]           | E2F-1 [T01542]     | TCF-4 [T02918]     |                               |

C

| Start position | End position | Dissimilarity | String | RE equally | RE query |
|----------------|--------------|---------------|--------|------------|----------|
| 19             | 23           | 0.207689      | CCTTT  | 11.47656   | 10.22397 |
| 103            | 107          | 0.207689      | AAAGG  | 11.47656   | 10.22397 |
| 119            | 123          | 0.207689      | AGAGG  | 11.47656   | 10.22397 |
| 266            | 270          | 0.000000      | ATAGG  | 11.47656   | 10.22397 |
| 398            | 402          | 0.000000      | ATAGG  | 11.47656   | 10.22397 |
| 731            | 735          | 0.207689      | AAAGG  | 11.47656   | 10.22397 |
| 1182           | 1186         | 0.000000      | CCTGT  | 11.47656   | 10.22397 |
| 1217           | 1221         | 0.000000      | ACAGG  | 11.47656   | 10.22397 |
| 1243           | 1247         | 0.207689      | AGAGG  | 11.47656   | 10.22397 |
| 1332           | 1336         | 0.207689      | CCTCT  | 11.47656   | 10.22397 |
| 1392           | 1396         | 0.000000      | CCTGT  | 11.47656   | 10.22397 |
| 1419           | 1423         | 0.207689      | AAAGG  | 11.47656   | 10.22397 |
| 1478           | 1482         | 0.207689      | CCTTT  | 11.47656   | 10.22397 |
| 1774           | 1778         | 0.207689      | CCTCT  | 11.47656   | 10.22397 |
| 1836           | 1840         | 0.207689      | CCTCT  | 11.47656   | 10.22397 |
| 2023           | 2027         | 0.207689      | CCTCT  | 11.47656   | 10.22397 |
| 2069           | 2073         | 0.207689      | CCTCT  | 11.47656   | 10.22397 |
| 2137           | 2141         | 0.207689      | AGAGG  | 11.47656   | 10.22397 |
| 2340           | 2344         | 0.000000      | ACAGG  | 11.47656   | 10.22397 |
| 2429           | 2433         | 0.207689      | CCTCT  | 11.47656   | 10.22397 |
| 2522           | 2526         | 0.000000      | ACAGG  | 11.47656   | 10.22397 |
| 2656           | 2660         | 0.207689      | AAAGG  | 11.47656   | 10.22397 |
| 2752           | 2756         | 0.207689      | AGAGG  | 11.47656   | 10.22397 |
| 2789           | 2793         | 0.000000      | CCTGT  | 11.47656   | 10.22397 |
| 2859           | 2863         | 0.000000      | CCTGT  | 11.47656   | 10.22397 |
| 2874           | 2878         | 0.207689      | CCTCT  | 11.47656   | 10.22397 |

B

```

1 gaattcagaa ttttagacc TTTggccttg ggggccatcc tggagaccct gaggtctaag
61 ctacagcccc tcagccaacc acagaccctt ctctggctcc caaAAAGGagt tcagtcacAG
121 AGGgttggtca cccacccttc agggatgaga agttttcaag gggtattact caggcaactaa
181 cccacaggaaa gatgacagca cattgccata aagttttggt tgtttttctaa gccagtgcaa
241 ctgcttattt tagggatttt ccgggATAGG gtggggaagt ggaaggaatc ggcgagtaga
301 agagaaaagcc tgggaggggt gaagttaggg atctaggggc agttttggctg atttggggat
361 gcggttggtgg gaggtgctgg atggagttaa gtgaaggATA GGTgcctga gggagtagtc
421 ccgaagtctc ccagaccca ctactcacg gtggcagcgg tgagctacca gtcctacaaa
481 gatccgcggg gatggagagc caggaggcgg gggctgcccc tgaggtagcg gggaggccgg
541 ggggcggggg ggccgacggg acgagtgcac tattggcggg ggaaaaaaca acactgcacc
601 gcgtcccgctc ctgcccgccc gcccgggccc ggaaccggct ggaaccggcc tgaagccggc
661 ccgaccggga acccgggccc ctggggagtt ggggtcacct tgaaggccag agagacttgg
721 cgcccggaag CAAAGGaaat ggcaaggggg aggggggagg gtttgcggag gtttgcggag
781 tcagaaggcc cgctttccga cgccggggcg ttgcgcgcgc ttgctcttta agtaactcaga
841 ctgcgcggcg cgagccgtcc gcattgtgac gcgtgtccca gcaacccaac tgaattggctg
901 ttgctttggca atgcccggag ttgaggtttg gggccgccca cctagctact cgtgtttctt
961 ccggtcgtgc agttgggggg ctcccgcctc cccggccggc tctctgggctg gctgacgtca
1021 gatgtcccca cccgcgccag cgctgcgcc aaggtctcgc agcaacaaa ccctcgctcc
1081 cgggcgcggg cgccggggcg agagcgggtg tctctgcct gctgatctga tgcgtccaa
1141 tccctgcctc cgccgaagtg tttttaaagt gttctttcca cCCTGTgtct ttggggctga
1201 gaactgtttt ctgaatACAG Gcggaaactg ttccgtcgcc cttagctact cgtgtttctt
1261 cgggacccaa gtctccactg ctgcgcggcg ctgggtagcg ttctctccct cgtgcaactg
1321 tgccgcgaac cCCTCTtgge tgctgcgcct taocgacctc acgtgtgctt ttgcccccg
1381 ctacgtgcct cCCTGTcccc aataccactc tgcctccccAA AGGatagttc tgtgtccgtg
1441 aatcccatte tgtaacccca cctactctct gcccccCCT TTttttgttt gagacggagc
1501 tttgctctgt cgccagggtc ggagtgcaat ggccgcatct cggctcactc cgtgtttctt
1561 ctcccgggtt caagcgattc tctgcctca gccctcctgag tagctgggtg tacagcgccc
1621 gccacccaag tcggctaatt tttgtagttt ttagtagaga cgaggtttca ccatctggc
1681 caggctggtc tgaaacccct gaaccttgta tccactcgcc tcggccttcc aaagtgttg
1741 gattacgggc gtgacgacgc tgccacgcac ctgcctctta agtacataac ggccacaca
1801 gaacgtgtcc aactcccccg cccacgttcc aacgtCCTCT cgtgtgcccc
1861 ttccacatac ctacgagccc caccgcctta gctccatttc ctccagacgc caccaccac
1921 cgtcccgagc tgcccctccc taaagctccc agccgtccac catgctgtgc gttcctccct
1981 ccctggccac ggcagtgacc ctctctccc gggccctgct tcCCTCTgc gggctctgct
2041 gcctcaetta ggcagcgtg cccttactCC TCTccgccc gtccgagcgg cccctcagct
2101 tcggcgccca gccccgcaag gctcccggtg accactAGAG Gcggggagga gctcctggcc
2161 agtggtggag agtggaagg aaggacccta ggggtcatcg gagccaggt ttaactccct
2221 aagtggaaat ttcttcccc actcctcctt gggtttctcc aaggaggga ccaggtctg
2281 tggaaagtcc ggctggggcg gggactgtgg gttcagggga gaacgggggt tgaacgggA
2341 CAGGgagcgg ttagaagggt ggggctattc cgggaagtgg tggggggagg gagcccaaaa
2401 ctagcaccta gtccactcat tatccagcCC TCTtatttc cgccgctct gcttcagtg
2461 acccggggag ggccgggaag tggagtgga gacactaggg tgggtctccc gacctgtgtg
2521 tACAGGacct cgacctagct ggctttgttc cccatcccca gtttagttgt gcttcaggg
2581 ctaaaactag agcccagggg ccccaagttc cagactgccc ctccccctc ccccgagcc
2641 agggagtggt tgggtAAAGG gggaggccag ctggagaaca aacgggtagt cagggggtg
2701 agcgattaga gccctgtac cctaccagg aatggttgg gaggaggagg aAGAGGtagg
2761 aggtagggga gggggcgggg ttttgtcaCC TGTcacctgc tcgctgtgcc tagggcgggc
2821 gggcggggag tggggggacc ggtataaagc ggtaggcgCC TGTgcccgt ccaCCTCTca
2881 agcagccagc gctgcctga atctgttctg cccctcccc accatttca ccaccaccat
2941 g

```

**Figure S4. Analysis of the promoter sequence of human MUC1 gene**

**A**) Transcription factors predicted to have binding sites in the *MUC1* promoter, identified with the software PROMO (ALGGEN Research Software). The dissimilarity threshold was lowered to 5% (95% of similarity). Glucocorticoid receptor-alpha (GR-alpha, purple box) was chosen for the identification of putative binding sites in the *MUC1* promoter. **B**) Sequence of the promoter region of human *MUC1* gene (accession number X69118.1) submitted to PROMO. Bolded capital letters mark putative binding sites of GR-alpha. The last three nucleotides identify the ATG start codon. **C**) Features of each GR-alpha binding site from the PROMO output: the *start* and *end* positions of the putative binding sequences are reported; *dissimilarity* indicates the percentage of dissimilarity between the putative and consensus binding sequences; *string* indicates the nucleotide sequence of the potential binding site; *Random expectation (RE)* indicates the expected occurrences of the match in a random sequence of the same length as the query sequence (*RE equally*: equiprobability for the 4 nucleotides; *RE query*: nucleotide frequencies as in the query sequence).

A

Factors predicted within a dissimilarity margin less or equal than 15 % :

|                                    |                          |                            |                               |
|------------------------------------|--------------------------|----------------------------|-------------------------------|
| Pax-5 [T00070]                     | p53 [T00671]             | GR-alpha [T00337]          | PPAR-alpha:RXR-alpha [T05221] |
| AP-2alphaA [T00035]                | FOXP3 [T04280]           | PR B [T00696]              | PR A [T01661]                 |
| ENKTF-1 [T00255]                   | NFI/CTF [T00094]         | GR [T05076]                | c-Myb [T00137]                |
| EBF [T05427]                       | YY1 [T00915]             | ER-alpha [T00261]          | c-Jun [T00133]                |
| VDR [T00885]                       | PXR-1:RXR-alpha [T05671] | TBP [T00794]               | RXR-alpha [T01345]            |
| HOXD10 [T01425]                    | HNF-1B [T01950]          | USF2 [T00878]              | ATF3 [T01313]                 |
| HNF-3alpha [T02512]                | NF-AT1 [T00550]          | AhR-Amt [T05394]           | AhR [T01795]                  |
| Egr-3 [T00243]                     | NF-kappaB1 [T00593]      | IRF-2 [T01491]             | HNF-4alpha [T03828]           |
| <b>RAR-beta:RXR-alpha [T05420]</b> | PU.1 [T02068]            | AP-1 [T00029]              | c-Fos [T00123]                |
| RBP-Jkappa [T01616]                | MAZ [T00490]             | Sp1 [T00759]               | NF-kappaB [T00590]            |
| C/EBPbeta [T00581]                 | C/EBPalpha [T00105]      | LEF-1 [T02905]             | NF-1 [T00539]                 |
| GR-beta [T01920]                   | TFII-1 [T00824]          | STAT4 [T01577]             | c-Ets-1 [T00112]              |
| HNF-1A [T00368]                    | RelA [T00594]            | XBP-1 [T00902]             | GCF [T00320]                  |
| TFIID [T00820]                     | PEA3 [T00685]            | Elk-1 [T00250]             | AR [T00040]                   |
| <b>RAR-beta [T00721]</b>           | GATA-1 [T00306]          | HNF-1C [T01951]            | HOXD9 [T01424]                |
| c-Ets-2 [T00113]                   | T3R-beta1 [T00851]       | <b>RAR-alpha1 [T00719]</b> | IRF-1 [T00423]                |
| SRV [T00997]                       | TCF-4E [T02878]          | GATA-2 [T00308]            | E2F-1 [T01542]                |
| COUP-TF1 [T00149]                  | STAT5A [T04683]          | Ik-1 [T02702]              | MEF-2A [T01005]               |
| NF-AT2 [T01945]                    | STAT1beta [T01573]       | NF-AT1 [T01948]            | ETF [T00270]                  |
| NF-Y [T00150]                      | E2F [T00221]             | TCF-4 [T02918]             |                               |

C

| Start position            | End position | Dissimilarity | String        | RE equally | RE query |
|---------------------------|--------------|---------------|---------------|------------|----------|
| <b>RAR-beta:RXR alpha</b> |              |               |               |            |          |
| 1826                      | 1837         | 14.955991     | TGGCGTGAACCC  | 0.38561    | 0.59539  |
| 2570                      | 2581         | 12.463326     | TGAGCAGAGCCC  | 0.24084    | 0.37816  |
| 3364                      | 3375         | 14.955991     | TGACCTGTTCCC  | 0.38561    | 0.59539  |
| 3536                      | 3547         | 14.955991     | TCCCAGGTTC    | 0.38561    | 0.59539  |
| 3543                      | 3554         | 12.463326     | TTCCCTGGCCCC  |            |          |
| <b>RAR-alpha</b>          |              |               |               |            |          |
| 819                       | 831          | 13.441672     | GTCCCGTGACCCA | 0.05736    | 0.07299  |
| 2216                      | 2228         | 11.143532     | CCTCCGTGACCT  | 0.03032    | 0.03582  |
| <b>RAR-beta</b>           |              |               |               |            |          |
| 531                       | 540          | 3.244529      | CTCAAACCCA    | 0.22461    | 0.24826  |
| 827                       | 836          | 7.478240      | ACCCAACCCA    | 0.44922    | 0.49744  |
| 1365                      | 1374         | 6.452127      | CGGGTTTGTA    | 0.03691    | 0.34136  |
| 1701                      | 1710         | 4.326039      | GGGGTTCGAG    | 0.26672    | 0.28233  |
| 1829                      | 1838         | 5.389083      | CGTGAACCCG    | 0.28076    | 0.32228  |
| 2295                      | 2304         | 8.541284      | CAGAAACCT     | 0.49133    | 0.52651  |
| 2500                      | 2509         | 10.667372     | TTACAACCT     | 0.25269    | 0.26114  |
| 2649                      | 2658         | 7.496706      | CTTCAACCCA    | 0.44922    | 0.49744  |
| 3324                      | 3333         | 10.704304     | CAGGAACCCG    | 0.25269    | 0.26114  |

**Figure S5. Analysis of the promoter sequence of human MUC4 gene**

**A)** Transcription factors predicted to have binding sites in the *MUC4* promoter, identified with the software PROMO (ALGGEN Research Software). The dissimilarity threshold was left at the default value of 15% (85% of similarity). RAR-beta:RXR-alpha (black box), RAR alpha (blue box), and RAR-beta (red box) were chosen for the identification of their putative binding sites in the *MUC4* promoter. **B)** Sequence of the promoter region of the human *MUC4* gene (accession number AF241535.2) submitted to PROMO. Bolded capital letters mark the putative binding sites for RAR-beta:RXR-alpha (black), RAR alpha (blue), and RAR-beta (brown). Overlapping binding sites are shaded. The last three nucleotides identify the ATG start codon (red). **C)** Features of each transcription factor binding site: the *start* and *end* positions of the putative binding sequences are reported; *dissimilarity* indicates the percentage of dissimilarity between the putative and consensus binding sequences; *string* indicates the nucleotide sequence of the potential binding site; *Random expectation (RE)* indicates the expected occurrences of the match in a random sequence of the same length as the query sequence (*RE equally*: equiprobability for the 4 nucleotides; *RE query*: nucleotide frequencies as in the query sequence).

B

|      |                    |                    |                    |                    |                    |                      |
|------|--------------------|--------------------|--------------------|--------------------|--------------------|----------------------|
| 1    | gtcgtggg           | gtcggccc           | gtgattgccc         | ttcttttgc          | ttggagccag         | gcagaacaga           |
| 61   | gctcaaat           | cagctttgg          | acagtgtgtg         | gcccaaaa           | ctgtaaatgc         | ggagtttaaca          |
| 121  | ctctccagt          | tccttagatg         | gtccgacctg         | gccggtgat          | cggggatgat         | gaagctcctg           |
| 181  | gagcctcagc         | gtgctcactt         | gagaggttagg        | gcagcgcttt         | gtacttcaca         | gggccaatggg          |
| 241  | gacagggtca         | gggcctaaaa         | ctctagtgtac        | cggtctcatg         | ctgggtcatc         | gactagggaa           |
| 301  | tccacacacc         | tttttagtcc         | agactgagta         | ggtaaataaa         | acttaataaa         | ctccagcttt           |
| 361  | ctgctcgag          | ctcagctcag         | ttgtcttaag         | ttgtcctaag         | ttgaacttta         | ttcacagcac           |
| 421  | gaggcataaa         | tgatataaag         | gtaagcaatt         | ttaggggacc         | caaaaaacta         | gtgactccta           |
| 481  | cttgggtagc         | ttagaagggg         | aatctctctt         | ggagatcctg         | gctttgtctg         | <b>CGCAACCCA</b>     |
| 541  | gctgtctctt         | caagccaagt         | ctgggagaat         | ctcatgatct         | tatcttctgt         | ccaatttact           |
| 601  | tacacccacc         | atccacacta         | agctcttctt         | gctctccgtg         | gaatattaac         | ttacactgga           |
| 661  | cttcagactc         | ctgcacctat         | gcagaccacg         | cgctatcgcg         | gctaggaggg         | tttttcggcc           |
| 721  | acaaggaact         | agagaagcca         | ctcattttgt         | ccctctcat          | tcaccccat          | ctgtcccat            |
| 781  | cggatgcctt         | gggaggagag         | aaggaaggac         | aaatgggtGT         | <b>CCCGTGACCC</b>  | <b>AACCCA</b> gatg   |
| 841  | aagacagagc         | catttatcac         | agagaccacg         | acgcataccta        | actctggaaa         | atggggcatat          |
| 901  | tgaggggagc         | tggaaagcag         | aagggaaacg         | ggcgtgggca         | gggaagaggt         | gaacaggagt           |
| 961  | gcgcacgccc         | agttctccag         | gatctcacgc         | tcctaatacg         | gatcctataa         | gactcaaaag           |
| 1021 | ggacgcagga         | aagacgtggg         | cctggaaaat         | cacttccgga         | ctcctcctgt         | atcctgctgt           |
| 1081 | gccctcggtt         | gtgtctccct         | ccagggatga         | tgcccgatg          | gaaggaggag         | ccacgttctt           |
| 1141 | ccacaggtgt         | ctctccacaac        | aggtgtctct         | acaacagggt         | gtcgtaaaca         | caaggtgtcc           |
| 1201 | tcacaacaag         | gtgtcttaata        | acctcccgca         | gccccctcag         | atctacaggc         | tcactccac            |
| 1261 | cctacaacct         | ttcagatagg         | tgtatcccca         | ttttacaggt         | gaacgaggaa         | aaaagtgaag           |
| 1321 | gctgtgactt         | tgtgtgtgag         | cggtggcaga         | gctgggatca         | agcc <b>CGGGTT</b> | <b>TGTA</b> acggcc   |
| 1381 | tcctggagtc         | tcctggcgta         | cagcagcttc         | cgagagcgcc         | tggtgctctc         | tgccctctct           |
| 1441 | ggcatgggaa         | agaggtcagc         | tacctgtgtt         | cggtcaacaa         | gatgtccacg         | gcttagtttg           |
| 1501 | gtctccactg         | gatgtctctt         | ttctctctag         | agatggaaaa         | ctgttgtctt         | gaaagcgta            |
| 1561 | ccaaacaaaa         | cctgtggaaa         | ggtaatgggg         | ggaccacaga         | ggaagagagt         | acagaaaaat           |
| 1621 | gaccacgggc         | cgggtgcagt         | ggctcacgcc         | tgtaatccca         | gcactttggg         | aggccaaggc           |
| 1681 | gggcggatca         | cttgagttca         | <b>GGGGTTCGAG</b>  | accaacctgg         | ccaacatggt         | aaaacctcgt           |
| 1741 | ccctactaaa         | aatacaaaaa         | aaattagccg         | ggcgtggttg         | cagttggcgt         | tagtcccgta           |
| 1801 | tactaggagag        | gctgagggag         | gggaa <b>TGGCG</b> | <b>TGAACCC</b> Ggg | aggcggagct         | tgcaagtggc           |
| 1861 | tgagatgggt         | ccactgcact         | ccagcctggg         | gcgacagagc         | aagactccat         | ctcaaaaaaa           |
| 1921 | aaaaaagtga         | aaatgatcac         | gaaggccaaag        | ctgggctctg         | gtgtctcgca         | atctctcgca           |
| 1981 | gtaggtctct         | cctgtctgcc         | cgtccaggcg         | ccacacaggt         | gctccacatg         | actctttacc           |
| 2041 | tttatgattt         | ttctacotcc         | aggaagaagc         | agggtcagct         | cgtccaccca         | gagctggagg           |
| 2101 | gactgttggg         | ggaccacgcc         | acttccccac         | ggtatccgca         | ttatcatggc         | tgggcccgag           |
| 2161 | ctttggcctg         | ggccatgaac         | agactttcag         | cttctagaag         | caagtggtca         | cagggg <b>CTCTGC</b> |
| 2221 | <b>GTGACCC</b> Tcg | gagacagcgc         | cacagcgtcg         | gttgctact          | cttctgtgga         | caaggctggc           |
| 2281 | tcgccttggg         | aatg <b>CAGAAA</b> | <b>CCCT</b> gagtc  | ttgtctgga          | ccccacagtg         | cttgagcatc           |
| 2341 | gaaggtccct         | gctctgggac         | gagtcacccc         | acagacaccc         | cacatctggg         | aatcaagtct           |
| 2401 | tcgcggaatca        | gaagcagaga         | ttcacactgt         | ggcaaaaggg         | ggagcggagg         | tatccccgtt           |
| 2461 | ttcctttgca         | gagagctaca         | ccaactgcc          | ttcttgctT          | <b>TACAACCTA</b>   | cttggggtcc           |
| 2521 | ctttccctcc         | tcgctgtgtc         | ctgtgagttc         | caagaggttg         | aactgggggT         | <b>GAGCAGAGCC</b>    |
| 2581 | <b>Cccaggtct</b>   | ccaggagctc         | ctccacotcc         | tcacaggtta         | cagtgcgttc         | ctctaccaga           |
| 2641 | ggttttg <b>CT</b>  | <b>TCAACCCA</b> ct | gcccgtgcca         | gctccctcag         | gccagtctcc         | cagactgtcc           |
| 2701 | ctggctccct         | gcacccctgg         | tcacagctcc         | tgccctggaa         | agaagaagtc         | caccacttgg           |
| 2761 | tgagggtctg         | ccacgcatct         | ggggctctgc         | atgcgtctg          | actgagtttc         | tgccacaggt           |
| 2821 | ctgcaactgag        | gttctgcat          | gcgtctggag         | cttgccaacg         | gtctggggtc         | tgccacgcgt           |
| 2881 | ctggagctct         | ccatgggtct         | ggggctctgc         | atgtgtcttg         | gatctgccc          | gcgtctggg            |
| 2941 | tctgccacgc         | atctgcaact         | aggttctgcc         | acgcgtctgg         | ggctgtgcat         | tgctgtgca            |
| 3001 | tgaggtctct         | ccacgcgtct         | ggggctcgcc         | atgcgtctgg         | ggctgtgca          | gcgtctggg            |
| 3061 | tctgcacgc          | acttgcactg         | agcagatatt         | ccaagcacac         | caccactttc         | caaaagacgg           |
| 3121 | catcacagtc         | atcttctgtc         | ctgcccctca         | ccacactggt         | tcoccgcttc         | ctactctctt           |
| 3181 | ggggctctgt         | taagtctcac         | ttcttttccc         | ccattcctac         | agccccaaag         | tcgctccctc           |
| 3241 | tggggccctt         | ttttcccatc         | ttctccacgc         | agccccaaag         | ctctgggtgg         | caggggcagc           |
| 3301 | cctgggggag         | ccaggaagag         | acc <b>CAGGAAC</b> | <b>CCG</b> gctagga | gggtggccca         | ccactttcca           |
| 3361 | gtg <b>TGACCTG</b> | <b>TTCCCA</b> ttcc | cccatgtctc         | ctcccatccc         | tcocgcca           | cagctcagc            |
| 3421 | tgatgagaa          | gagagcaacg         | gggtgatcgg         | tggtttcttt         | cctgggtggg         | tagtgggggt           |
| 3481 | gggtgagga          | cgagaaaagg         | tgattagcgt         | ggggcccccgc        | ctctttttgt         | ctct <b>TCCCA</b>    |
| 3541 | <b>GGTTCCCTGG</b>  | <b>CCCC</b> ttcga  | gaacgcact          | tggttcgggc         | cagccgcctg         | aggggacggg           |
| 3601 | ctcacgtctg         | ctcctcacac         | tgcagctgct         | gggcccgtga         | gcttccccag         | ggagccaggg           |
| 3661 | ggacttttgc         | cgacg <b>ccatg</b> |                    |                    |                    |                      |

**BLACK bold:** RAR-beta:RXR-alpha

**BLUE bold:** RAR-alpha

**BROWN bold:** RAR-beta

shaded sequences: shared by overlapping binding sites



```

1  gaccaagccc agttcccaat tggccctttt gcccggggag gtccttagtg gagggagagg
61  gcaaagtctg gcccccaatt gtttgggtgc actgtgtgcc agcggggccac tggcggggcga
121 ggttggtcca ggggtggaggc ggggaggggt ggaccacagg cactgagcgg ggacagagga
181 gctgcctgag ggtcccagct ctgccatgga gaaaacgcta tctcgtgatg gcagaggtgc
241 ccgcccactc cgagctgggg gtgagggggc tgctcccagc tggggccgcca gcccccatga
301 aggccgcggg caccggccgt ggtcagggag ggcaggggac aggcagtggg ggccagcagg
361 ggagacacta ggcttggccc cagcaccacg gtgggcatcg gcttgtgagc tggagccgcg
421 ggcagggagg ggggatgtca cgagggcctt gctaagggtg gagacctggg cgggtgcgtc
481 gggggacgtc tgcagcagag gcctgggcag caggcacacc cctcctgcca gtgcgaggaa
541 cgaggcgcca cagcggcccg tagcccccga tttgccaGC CTGGCctgga gcaggcagga
601 aggccgggga gaggggtctg gctggggcct ggggtgcagt acagccacga gcccaggggt
661 ggggagtctg gccaccctc cagaccatcc tcaaggcca ctggcccagg catccccgcc
721 caccctccc accgtgccgt gctgcagcgg gtctaccggc ctggatgtga aagagagctt
781 ggagacccca gagacctcgg aaccttcagc tttggaagtg acgtcgggtg ggtgggtggg
841 gggggcacag gctctggagt cccggaagtg agcggggagc tacgttgaga tctgggagac
901 cccctgcccc caccaggtta cagggccagg cagaagcccc aggtgtgccc tgaggtaaag
961 aaaccgtcac aaagaacaaa gggagaagGC gGGtCCAgc ctccaccaca gccctcgcgc
1021 tctgaggagc cacctggggg cctcagccat gaggggtgac aggtggcaaa acgggccagc
1081 tccgttcacg tcgctgtgca gctgtctccg ccctccatct ccagaacgtt ctcacattcc
1141 caagctgaaa cctgtcccc atgcaacacc agctcaccat cccctctgcc agccctggc
1201 gcccaccgtc cacactccgt ctctgcgggt ttcattgact caggggacgc acacgagtgg
1261 cccctcctgc ctttgtcctc tgtgtccacc tgcctcactc tgcacagtgt cccagcttc
1321 ccccatggag cagcctgggc cagcctctcc ttttcacggc tgaaccgtat tccaccgcac
1381 ggatcagcct cacgatgtg acccagtcct ccgcccaggg acacatgggc agcttctgcc
1441 tttgtcagtg atgtgtgtg ggacatgggt gtgcaaagt gtctcaggac ccgcttcag
1501 ttcttctggg gacagacca gagtgaggtt gctggtcacc cccaccagca gggcacaggg
1561 ctccgggtcc ccacgtctct gccaacactt cctacttctt gtgtttcttg atccccgcca
1621 tcctattgag cgtgagacag gtcagaagct ttgaagatgg gctttcgtct tgtcccagaa
1681 atcccacctc taagaattta acttcagaaa gacaaacgcg ggggagctgg tgcagggccc
1741 gtgacgggga ctgtgacgta aataaaacaa cagacctgga caccacccta ggggtcccat
1801 ggggcccggc gaggccacac caccgacct ggtgcttcca tGCCTGGCgt ctgcgccacg
1861 gagcatttca ggacgtgggt gaccagggag ccaggaggtg ggagcatctg aggtgcaggt
1921 cacacgggca ggaggtgttt gcaagaggta ttgcagcgcg gacggagtgt cctgcagatg
1981 acgctgtctg tcctgtagat gacgctcgtc aaggaggttt accacatagc cccaggaag
2041 cccaccgac accagccgga ggtgctaggc ttctgcggct cccacctggg gcaggcggag
2101 gaccccgggc aggtccagga ccccccggag cagctgcttc ctcaaccctg ccagggttaa
2161 tgaggaggcc ccagagtgag gtggaggcca aatgggactc agggccggag cctctgGCCT
2221 GGCtggatca gggctggcat tggacaagcg cagctgactc ccgatgtgca tggccaggag
2281 acactctggg cctcagtctc ccttgaatg tgaacctga aacagatcag cccagagacc
2341 tcccacggtc ttcaaggggc tctggtcagc tgggctgggg tctctggaat tagagcctct
2401 tccagggacc cccacaagcc acccagactg agcatcctgg ccatgtgcat gcctgagctc
2461 cagcctcgtg ggccctcccc gggcctcggg gacccatggt cagtggctgg ggggtgctgc
2521 cagaggctgg gattcccttc cagcaggagc cgcagtgggg ctgagtgtga ggcaggctgg
2581 ctgaccactg tttccatgga cctgctgctc aaggccagcc ctgccttcca gcggttttgc
2641 catctaggac gggtgccagg tggggtaggc ccttctctcc cttccgattc tcagaagctg
2701 ctgggggttg gggcgtcctg ggcctcaggg cacagagctg caaatccttc ctgatccagg
2761 cctctcccc tccacagccc ctccccgaga gcaaacacac gtggctggag cggggaagag
2821 cacggtgccc tgcgtgGCCT GGCCTGGCtt ggggccaaag ctccctgcta cataagctgg
2881 ggcccccagg ggagcaagca cccggcccgg ctccctccct gcccgctccc gtccccccac
2941 ccgtgccagc cccaggatg

```

**Figure S6. *MUC5B* promoter sequence (accession number AJ012453)**

Green bold capital letters mark the butyrate response elements [37]. The nucleotide sequence high-lighted in blue matches the consensus sequence of butyrate response elements (**GCgGGctCCA**) [38]. Exact matches were retrieved using BLASTn search (NCBI). The last three nucleotides identify the ATG start codon (red).

**Table S1. Mucin expression pattern in control tissue (normal gut mucosa) of Colon and Ileum**  
Expression in cellular compartments is classified as: **c**, cytoplasmic (non-vacuolar); **m**, membranous (apical membrane); and **v**, vacuolar (glicocalix). N.D., not detected.

| <i>Case n.</i> | <i>Tissue</i> | <i>MUC1</i> | <i>MUC2</i> | <i>MUC4</i> | <i>MUC5B</i> | <i>MUC12</i> | <i>MUC13</i> | <i>MUC15</i> | <i>MUC17</i> |
|----------------|---------------|-------------|-------------|-------------|--------------|--------------|--------------|--------------|--------------|
| 1              | Colon         | v+m         | v           | c+v         | c+v          | m            | c            | m            | N.D.         |
| 2              | Colon         | v+m         | v           | c+v         | c+v          | m            | c            | m            | N.D.         |
| 3              | Colon         | v+m         | v           | c+v         | c+v          | m            | c            | m            | N.D.         |
| 4              | Colon         | v+m         | v           | c+v         | c+v          | m            | c            | m            | N.D.         |
| 5              | Colon         | v+m         | v           | c+v         | c+v          | m            | c            | m            | N.D.         |
| 6              | Colon         | v+m         | v           | c+v         | c+v          | m            | c            | m            | N.D.         |
| 7              | Colon         | v+m         | v           | c+v         | c+v          | m            | c            | m            | N.D.         |
| 8              | Colon         | v+m         | v           | c+v         | c+v          | m            | c            | m            | N.D.         |
| 9              | Colon         | v+m         | v           | c+v         | c+v          | m            | c            | m            | N.D.         |
| 10             | Colon         | v+m         | v           | c+v         | c+v          | m            | c            | m            | N.D.         |
| 1              | Ileum         | N.D.        | v           | N.D.        | c            | N.D.         | c+m          | N.D.         | m            |
| 2              | Ileum         | N.D.        | v           | N.D.        | c            | N.D.         | c+m          | N.D.         | m            |
| 3              | Ileum         | N.D.        | v           | N.D.        | c            | N.D.         | c+m          | N.D.         | m            |
| 4              | Ileum         | N.D.        | v           | N.D.        | c            | N.D.         | c+m          | N.D.         | m            |
| 5              | Ileum         | N.D.        | v           | N.D.        | c            | N.D.         | c+m          | N.D.         | m            |
| 6              | Ileum         | N.D.        | v           | N.D.        | c            | N.D.         | c+m          | N.D.         | m            |
| 7              | Ileum         | N.D.        | v           | N.D.        | c            | N.D.         | c+m          | N.D.         | m            |
| 8              | Ileum         | N.D.        | v           | N.D.        | c            | N.D.         | c+m          | N.D.         | m            |
| 9              | Ileum         | N.D.        | v           | N.D.        | c            | N.D.         | c+m          | N.D.         | m            |
| 10             | Ileum         | N.D.        | v           | N.D.        | c            | N.D.         | c+m          | N.D.         | m            |



**Table S2. Mucin expression pattern in treatment-naïve UC patients**

Expression in cellular compartments is classified as: **c**, cytoplasmic (non-vacuolar); **m**, membranous (apical membrane); and **v**, vacuolar (glycocalix). N.D., not detected.

| <i>Case n.</i> | <i>MUC1</i> | <i>MUC2</i> | <i>MUC4</i> | <i>MUC5B</i> | <i>MUC12</i> | <i>MUC13</i> | <i>MUC15</i> | <i>MUC17</i> |
|----------------|-------------|-------------|-------------|--------------|--------------|--------------|--------------|--------------|
| 1              | c+v+m       | v           | c           | c            | m            | c            | m            | N.D.         |
| 2              | c+v+m       | v           | c           | c+v          | m            | c            | m            | N.D.         |
| 3              | c+v+m       | v           | c           | c            | m            | c            | m            | N.D.         |
| 4              | c+v+m       | v           | c           | c            | m            | c            | N.D.         | N.D.         |
| 5              | c+v+m       | v           | c           | c            | m            | c            | N.D.         | N.D.         |
| 6              | c+v+m       | v           | c           | c            | m            | c            | N.D.         | N.D.         |
| 7              | c+v+m       | v           | c           | c            | m            | c            | N.D.         | N.D.         |
| 8              | c+v+m       | v           | c           | c+v          | m            | c            | m            | N.D.         |
| 9              | c+v+m       | v           | c           | c            | m            | c            | m            | N.D.         |
| 10             | c+v+m       | v           | c           | c            | N.D.         | c            | N.D.         | N.D.         |
| 11             | c+v+m       | v           | c           | c+v          | m            | c            | N.D.         | c            |
| 12             | c+v+m       | v           | c           | c            | m            | c            | N.D.         | N.D.         |
| 13             | c+v+m       | v           | c           | c+v          | m            | c            | N.D.         | N.D.         |
| 14             | c+v+m       | v           | c           | c            | m            | c            | N.D.         | N.D.         |
| 15             | c+v+m       | v           | c           | c            | m            | c            | m            | N.D.         |
| 16             | c+v+m       | v           | c           | c+v          | m            | c            | m            | N.D.         |
| 17             | c+v+m       | v           | c           | c+v          | m            | c            | m            | N.D.         |
| 18             | c+v+m       | v           | c           | c            | m            | c            | N.D.         | c            |
| 19             | c+v+m       | v           | c           | c            | m            | c            | N.D.         | N.D.         |
| 20             | c+v+m       | v           | c           | c            | m+c          | c            | m            | N.D.         |
| 21             | c+v+m       | v           | c           | c            | m            | c            | m            | c            |
| 22             | c+v+m       | v           | c           | c+v          | m            | c            | N.D.         | c            |
| 23             | c+v+m       | v           | c           | c            | m+c          | c            | m            | c            |
| 24             | c+v+m       | v           | c           | c+v          | m            | c            | N.D.         | N.D.         |
| 25             | c+v+m       | v           | c           | c            | m            | c            | m            | c            |
| 26             | c+v+m       | v           | c           | c            | m            | c            | m            | N.D.         |
| 27             | c+v+m       | v           | c           | c            | m            | c            | N.D.         | N.D.         |
| 28             | c+v+m       | v           | c           | c+v          | m            | c            | m            | N.D.         |
| 29             | c+v+m       | v           | c           | c            | m            | c            | m            | N.D.         |
| 30             | c+v+m       | v           | c           | c            | m            | c            | N.D.         | N.D.         |
| 31             | c+m         | v           | c           | c+v          | m            | c            | m            | N.D.         |
| 32             | c+m         | v           | c           | c+v          | m            | c            | N.D.         | N.D.         |
| 33             | c+v+m       | v           | c           | c+v          | m            | c            | m            | N.D.         |
| 34             | c+m         | v           | c           | c            | m            | c            | m            | N.D.         |
| 35             | c+v+m       | v           | c           | c            | m            | c            | N.D.         | N.D.         |
| 36             | c+m         | v           | c           | c+v          | m            | c            | m            | N.D.         |
| 37             | c+m         | v           | c           | c            | m            | c            | m            | N.D.         |
| 38             | c+v+m       | v           | c           | c            | m            | c            | m            | c            |
| 39             | c+m         | v           | c           | c+v          | m            | c            | m            | N.D.         |
| 40             | c+m         | v           | c           | c+v          | m            | c            | m            | N.D.         |

**Red:** abnormal expression pattern.

**Table S3. Mucin expression pattern in UC patients after first-line treatment**

Expression in cellular compartments is classified as: **c**, cytoplasmic (non-vacuolar); **m**, membranous (apical membrane); and **v**, vacuolar (glycocalix).

| <i>Case n.</i> | <i>Clinical state</i> | <i>Terapy</i> | <i>MUC1</i> | <i>MUC2</i> | <i>MUC4</i> | <i>MUC5 B</i> | <i>MUC1 2</i> | <i>MUC 13</i> | <i>MUC 15</i> | <i>MUC 17</i> |
|----------------|-----------------------|---------------|-------------|-------------|-------------|---------------|---------------|---------------|---------------|---------------|
| 1              | Relapse               | NSAIDs        | c+m         | v           | c           | c+v           | m             | c             | m             | //            |
| 2              | Relapse               | Biol. Ag      | c+m         | v           | c           | c+v           | m             | c             | m             | c             |
| 3              | Relapse               | NSAIDs,GC     | c+m         | v           | c           | c+v           | m             | c             | //            | //            |
| 4              | Relapse               | NSAIDs        | c+v+m       | v           | c           | c+v           | m             | c             | m             | //            |
| 5              | Relapse               | NSAIDs        | v+m         | v           | c           | c+v           | m             | c             | //            | c             |
| 6              | Relapse               | Biol. Ag      | c+m         | v           | c           | c+v           | m             | c             | m             | //            |
| 7              | Relapse               | Biol. Ag      | c+m         | v           | c           | c+v           | m             | c             | m             | //            |
| 8              | Relapse               | NSAIDs        | c+m         | v           | c           | c             | m             | c             | //            | //            |
| 9              | Relapse               | NSAIDs        | c+m         | v           | c           | c             | //            | c             | m             | //            |
| 10             | Relapse               | Biol. Ag      | c+m         | v           | c           | c+v           | m             | c             | m             | c             |
| 11             | Relapse               | NSAIDs        | c+m         | v           | c           | c             | m             | c             | m             | //            |
| 12             | Relapse               | Biol. Ag      | c+m         | v           | c           | c+v           | m             | c             | //            | //            |
| 13             | Relapse               | Biol. Ag      | c+v+m       | v           | c           | c             | m             | c             | m             | //            |
| 14             | Relapse               | Biol. Ag      | c+v+m       | v           | c           | c             | m             | c             | //            | //            |
| 15             | Relapse               | NSAIDs        | c+m         | v           | c           | c             | m             | c             | m             | c             |
| 16             | Relapse               | GC            | c+m         | v           | c           | c+v           | m             | c             | m             | //            |
| 17             | Relapse               | GC            | c+m         | v           | c           | c+v           | m             | c             | //            | //            |
| 18             | Relapse               | NSAIDs        | c+v+m       | v           | c           | c+v           | m             | c             | m             | //            |
| 19             | Relapse               | GC            | c+m         | v           | c           | c             | m             | c             | m             | //            |
| 20             | Relapse               | GC            | c+v+m       | v           | c           | c             | m             | c             | //            | //            |
| 21             | Remission             | GC            | v+m         | v           | c           | c+v           | m             | c             | m             | //            |
| 22             | Remission             | GC            | v+m         | v           | c           | c             | m             | c             | m             | //            |
| 23             | Remission             | NSAIDs        | c+v         | v           | c           | c             | m             | c             | m             | //            |
| 24             | Remission             | NSAIDs        | c+v         | v           | c           | c             | m             | c             | m             | //            |
| 25             | Remission             | NSAIDs        | c+v         | v           | c           | c+v           | m             | c             | m             | //            |
| 26             | Remission             | NSAIDs        | c+v         | v           | c+v         | c+v           | m             | c             | m             | //            |
| 27             | Remission             | NSAIDs        | c+v         | v           | c           | c+v           | m             | c             | m             | //            |
| 28             | Remission             | Biol. Ag      | c+m         | v           | c           | c             | m             | c             | m             | //            |
| 29             | Remission             | NSAIDs        | c+v         | v           | c           | c+v           | m             | c             | m             | //            |
| 30             | Remission             | NSAIDs        | c+v         | v           | c           | c+v           | m             | c             | m             | //            |
| 31             | Remission             | NSAIDs,GC     | v+m         | v           | c           | c+v           | m             | c             | m             | //            |
| 32             | Remission             | NSAIDs        | c+v         | v           | c           | c             | m             | c             | m             | //            |
| 33             | Remission             | NSAIDs        | c+v         | v           | c           | c             | m             | c             | m             | c             |
| 34             | Remission             | GC            | v+m         | v           | c           | c+v           | m             | c             | m             | //            |
| 35             | Remission             | Biol. Ag      | c+v         | v           | c           | //            | m             | c             | m             | //            |
| 36             | Remission             | Biol. Ag      | c+v         | v           | c+v         | c+v           | m             | c             | m             | //            |
| 37             | Remission             | NSAIDs        | c+v         | v           | c+m         | c             | //            | c             | //            | c             |
| 38             | Remission             | NSAIDs        | c+v         | v           | c           | c             | //            | c             | //            | c             |
| 39             | Remission             | NSAIDs,GC     | v+m         | v           | c           | c             | //            | c             | //            | c             |
| 40             | Remission             | NSAIDs,GC     | v+m         | v           | c           | c             | m             | c             | m             | //            |

**Red:** abnormal expression pattern.

**NSAIDs:** nonsteroidal anti-inflammatory drugs. **GC:** glucocorticoids. **Biol. Ag.:** biological agents

**Table S4. Anti-mucin antibodies used in the study**

| Mucin          | Vendor<br>(catalog no.) | Host species-<br>Clonality | Reactivity | Dilution | Antigen retrieval |
|----------------|-------------------------|----------------------------|------------|----------|-------------------|
| <b>MUC1*</b>   | Abcam (ab109185)        | Rabbit - Monoclonal        | Human      | 1:250    | Citrate buffer    |
| <b>MUC2*</b>   | Abcam (ab134119)        | Rabbit - Monoclonal        | Human      | 1:800    | Citrate buffer    |
| <b>MUC4*</b>   | Abcam (ab150381)        | Rabbit - Monoclonal        | Human      | 1:750    | Citrate buffer    |
| <b>MUC5B*</b>  | Abcam (ab87376)         | Rabbit - Polyclonal        | Human      | 1:400    | Citrate buffer    |
| <b>MUC12*</b>  | Abcam (ab121777)        | Rabbit - Polyclonal        | Human      | 1:250    | EDTA              |
| <b>MUC13*</b>  | Abcam (ab235450)        | Rabbit - Polyclonal        | Human      | 1:4000   | EDTA              |
| <b>MUC15*</b>  | Abcam (ab224468)        | Rabbit - Monoclonal        | Human      | 1:500    | EDTA              |
| <b>MUC15**</b> | Invitrogen (BS-5878R)   | Rabbit - Polyclonal        | Human      | 1:100    | Citrate buffer    |
| <b>MUC17*</b>  | Abcam (ab122184)        | Rabbit - Polyclonal        | Human      | 1:200    | EDTA              |

\*IHC staining \*\*IF staining
